# Supplementary material for: Co-Enzyme Q10 Supplementation Rescues Cumulus Cells Dysfunction in a Maternal Aging Model
Source: MDPI journal article supplement (doi:10.3390/antiox8030058), 2019-03-08
Supplement: s1 [file s1]

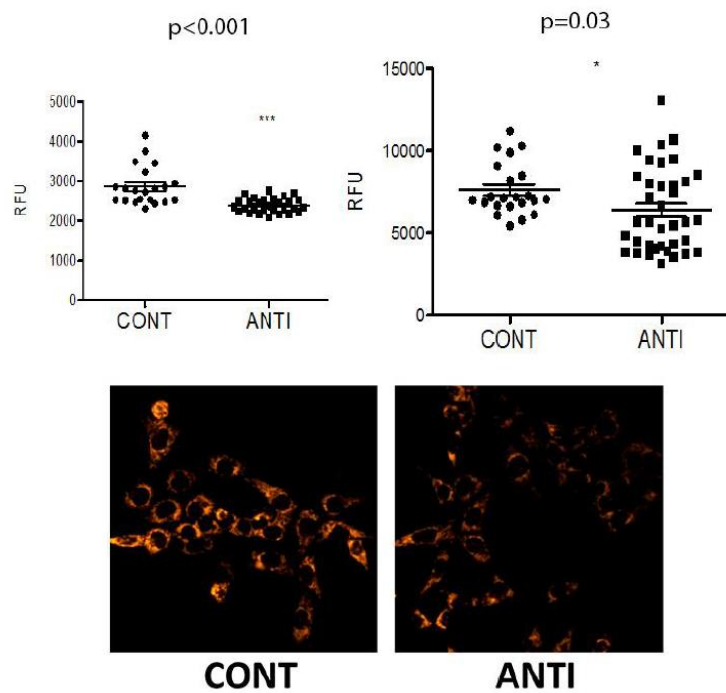

**Figure S1.** Specificity of Mitotracker signal in granulosa cells.

Cells were co-treated with inhibitor of complex III, antimycin for 30 min validating signal specificity. Each point represents a cell. Significantly decreased fluorescent intensity was observed in two independent experiments.

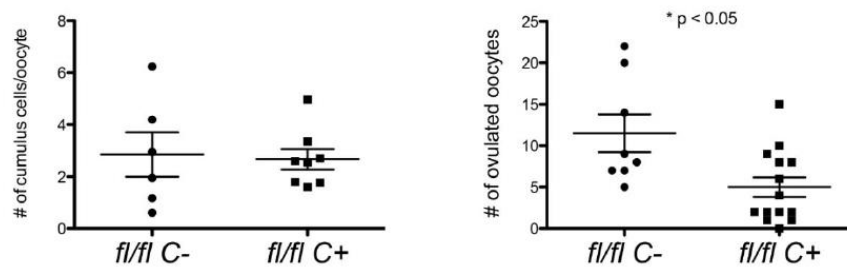

**Figure S2.** Cumulus cell number and ovulation rate in females with *Pdss2* deficient oocytes.

*Pdss2* deficiency in oocytes due to deletion by ZP3Cre recombinase in primary follicles does not change number of cumulus cells per oocyte but leads to significant decrease of ovulation rate. Data shown are number of cells per oocyte per female (left panel) or number of total ovulated oocytes per females (right panel); genotype *Pdss2* fl/fl C (WT) and fl/fl C+ (KO).

**Table 1.** Primer list with qRT-PCR conditions.

| Name of gene  | Primer Sequence                                   | Ref Sequence                | Amplicon size | % efficiency | annealing temperature |
|---------------|---------------------------------------------------|-----------------------------|---------------|--------------|-----------------------|
| <i>Bact</i>   | cggttccgatgcctgaggctctt<br>cgtcacacttcgatggaattga | <a href="#">NM_007393.5</a> | 99            | 100          | 62.5                  |
| <i>Coq2</i>   | atccacagagccgaggact<br>tcagctcgtctgtcacttc        | <a href="#">NM_027978.2</a> | 158           | 94           | 61.5                  |
| <i>Coq4</i>   | ctgactccgtcccaaga<br>acatctcccaaacatcac           | <a href="#">NM_178693.4</a> | 148           | 100          | 62.5                  |
| <i>Coq6</i>   | ggctgctactgacctgttga<br>aggagacactgcgttcgtg       | <a href="#">NM_172582.3</a> | 99            | 94           | 60                    |
| <i>Coq9</i>   | ctgggaggagcagcagtaga<br>ttgtgattccagccttgtg       | <a href="#">NM_026452.2</a> | 123           | 104          | 62.5                  |
| <i>Pdss1</i>  | ttttaccagactgtgcctaag<br>ccgaaaaacttgccaataaa     | <a href="#">NM_019501.3</a> | 126           | 101          | 61.5                  |
| <i>Pdss2</i>  | caggagagcttttggtgatg<br>tccttctctttttgttagtg      | <a href="#">NM_027772.2</a> | 133           | 99           | 60                    |
| <i>Ndufs3</i> | ttatggcttcgaggacatc<br>attcttgtgccagctccact       | <a href="#">NM_026688.2</a> | 118           | 94           | 62.5                  |
| <i>Ndufs4</i> | tgccgagtatgacgtgtctc<br>cttgcataggtccagcgaat      | <a href="#">NM_026610.1</a> | 155           | 100          | 62.5                  |
| <i>Uqc1</i>   | tactcctgtccccaggtcac<br>cgtaaagagaggccaagtgc      | <a href="#">NM_018888.4</a> | 201           | 104          | 61.5                  |
| <i>BACT</i>   | gcgttggttacaggaagtccttg<br>ctatcacctcccctgtgtgga  | <a href="#">NM_001101.4</a> | 100           | 99.7         | 60                    |
| <i>COQ2</i>   | ttttctggggacagctaa<br>ggctagttgaggccagtatga       | <a href="#">NM_015697.8</a> | 149           | 89           | 60                    |
| <i>COQ6</i>   | ctaagcagttggagctgtgt<br>atttggtctggaaggtgctg      | <a href="#">NM_182476.2</a> | 150           | 100          | 58                    |
| <i>COQ9</i>   | cgaggaggaggaggactatga<br>ccttctgcaatgcctct        | <a href="#">NM_020312.4</a> | 110           | 95           | 60                    |
| <i>PDSS1</i>  | atcatgcgacggttcagttt<br>ggcgaggtaggtgtttgtt       | <a href="#">NM_014317.4</a> | 93            | 105          | 58                    |
| <i>PDSS2</i>  | ttggtggtgctccttatctct<br>catgagtagatcccactgacc    | <a href="#">NM_020381.3</a> | 92            | 104          | 60                    |
